# Supplementary material for: Epidemiological Profile and Clinical Outcomes of Laboratory-Confirmed Measles Cases in Somalia: Insights from the National Public Health Reference Laboratory (NPHRL)
Source: Research Square preprint supplement (doi:10.21203/rs.3.rs-7338762/v1), 2025-08-27
Supplement: Supplementary file 1 [file 109928d5a30e42d37375450b.docx]

**Author Contributions**

**Titel Page**

**Epidemiological Profile and Clinical Outcomes of Laboratory-Confirmed Measles Cases in Somalia: Insights from the National Public Health Reference Laboratory (NPHRL)**

Saadaq Adan Hussein1,2, Marian Muse Osman3,4, Yahye Sheikh Abdulle Hassan5 ,Abdirahman Moallim Ibrahim6.

**Affiliations.**

1. Department School of Postgraduate Studies, Benadir University, Mogadishu, Somalia.
2. Department of Research and Policy Development, SOR Institute: Somalia Social Research, Mogadishu, Somalia.
3. Department Director Benadir University Institute of Research and Development , Mogadishu, Somalia.
4. Department Research at National Institute of Heath, Mogadishu, Somalia.
5. Department of Medicine and Surgery, Jamhuriya University of Science and Technology, Mogadishu, Somalia.
6. Department Faculty of Medicine and Surgery, Jazeera University, Mogadishu, Somalia.

**Data availability**

Our correspondents are available to provide raw data at any time, ensuring the smooth functioning of our initiatives.

**Sources of funding**

This research received no specific grant from funding agencies in the public, commercial or not-for-profit sectors.

**Acknowledgments**

We would like to extend our sincere gratitude to our co-authors for their time, effort, and valuable contributions to this research project. Special thanks to the management and staff of the National Public Health Reference Laboratory (NPHRL) for their dedication and support throughout the study.

**Author Note:**

Please address correspondence to Dr. Saadaq Adan Hussein, Mentorship Coordinator Department of School of Postgraduate Benadir University Mogadishu, Somalia. E-mail: [sadakadamh@gmail.com/MentorshipProgram@bu.edu.so](mailto:sadakadamh@gmail.com/MentorshipProgram@bu.edu.so) Address: Hodan Benadir, Mogadishu.

**Authors’ contributions**

Saadaq Adan Hussein conception and drafting the article Introduction, Marian Muse Osman Methodology, Yahye Sheikh Abdulle Hassan Data Analysis and Result, Abdirahman Moallim Ibrahim Discussion.
